# Supplementary material for: Direct observations indicate photodegradable oxygenated volatile organic compounds (OVOCs) as larger contributors to radicals and ozone production in the atmosphere
Source: Copernicus journal article supplement (doi:10.5194/acp-22-4117-2022), 2022-03-30
Supplement: Supplementary file 1 [file acp-22-4117-2022-supplement.pdf]

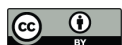

*Supplement of*

## **Direct observations indicate photodegradable oxygenated volatile organic compounds (OVOCs) as larger contributors to radicals and ozone production in the atmosphere**

**Wenjie Wang et al.**

*Correspondence to:* Bin Yuan (byuan@jnu.edu.cn) and Hang Su (h.su@mpic.de)

The copyright of individual parts of the supplement might differ from the article licence.

## 25 **1 Calibration of GC-MS**

26 Cylinder standard gases were employed to calibrate the online GC-MS/FID  
27 system. A 63-chemicals mixture standard (Spectra Gases) was used to calibrate C2–  
28 C6 OVOCs and halocarbons. The calibration curves for each species were acquired by  
29 diluting the mixture standard gas into five concentration gradients. The coefficients of  
30 determination ( $r^2$ ) for all calibration curves are larger than 0.995. Ambient  
31 concentrations of C2–C6 OVOCs were calculated according to their calibration  
32 curves. It is worth noting that these OVOCs may be unstable in cylinders.  
33 Additionally, the preconcentration procedures for the GC-MS technique may cause  
34 loss of the OVOCs especially under high RH condition because of their relatively  
35 high Henry constants. We compared OVOC concentrations measured by GC-MS and  
36 PTR-ToF-MS. The measurement results of the two instruments are generally similar  
37 (Figure S1). The differences of the two instruments for MVK+MACR, C<sub>3</sub>H<sub>4</sub>O and  
38 C<sub>4</sub>H<sub>8</sub>O are within 20%. However, acetone measured by GC-MS is 46% higher than  
39 that measured by PTR-ToF-MS. The differences between GC-MS and PTR-ToF-MS  
40 are acceptable, as uncertainties of OVOCs measurements of GC-MS and PTR-ToF-  
41 MS are in the range of 20-30%.

42 Given the higher accuracy of PTR-ToF-MS technology in terms of measuring  
43 OVOCs, we gave priority to utilizing the OVOCs data of PTR-ToF-MS for analysis in  
44 this study. To reduce the uncertainty of PTR-ToF-MS induced by isomers, the  
45 concentrations of acetone were determined by the difference between the C<sub>3</sub>H<sub>6</sub>O  
46 concentrations measured by PTR-ToF-MS and propanal concentrations measured by  
47 GC-MS; the concentrations of MVK and MACR were determined according to  
48 C<sub>4</sub>H<sub>6</sub>O concentration measured by PTR-ToF-MS and the ratio of MVK to MACR  
49 measured by GC-MS.

## 50 **2 The influence of measurement uncertainty on the calculation of P(RO<sub>x</sub>)**

51 The common OVOCs species were calibrated in this study. However, some  
52 OVOC species, including pyruvic acid, nitrophenol, methyl nitrophenol and carbonyls  
53 with large carbon number, were not calibrated. For these OVOC species, we used the  
54 method proposed by Sekimoto, et al.<sup>1</sup> to determine the relationship between VOC

55 sensitivity and kinetic rate constants for proton transfer reactions of  $\text{H}_3\text{O}^+$  with VOCs.  
56 The fitted line was used to determine the concentrations of those uncalibrated species.  
57 Following the discussions in Sekimoto, et al. <sup>1</sup>, the uncertainties of the concentrations  
58 for uncalibrated species were about 50 %. The uncertainties in the concentrations of  
59 these species lead to uncertainties of 0.04~0.23 ppb  $\text{h}^{-1}$  (1.3%~8.0%) in calculation of  
60  $\text{P}(\text{RO}_x)$ . Among these species,  $\text{C}_n\text{H}_{2n-2}\text{O}_2$  ( $n>3$ ) contributes the largest uncertainty,  
61 followed by  $\text{C}_n\text{H}_{2n-4}\text{O}_2$  ( $n>3$ ),  $\text{C}_n\text{H}_{2n-4}\text{O}_3$  ( $n>3$ ),  $\text{C}_n\text{H}_{2n-2}\text{O}$  ( $n>3$ ),  $\text{C}_n\text{H}_{2n}\text{O}$  ( $n>5$ ),  
62 pyruvic acid, nitrophenol and methyl nitrophenol.

63  
64  
65  
66  
67  
68  
69  
70  
71  
72  
73  
74  
75  
76  
77  
78  
79  
80  
81  
82  
83  
84  
85  
86  
87  
88  
89

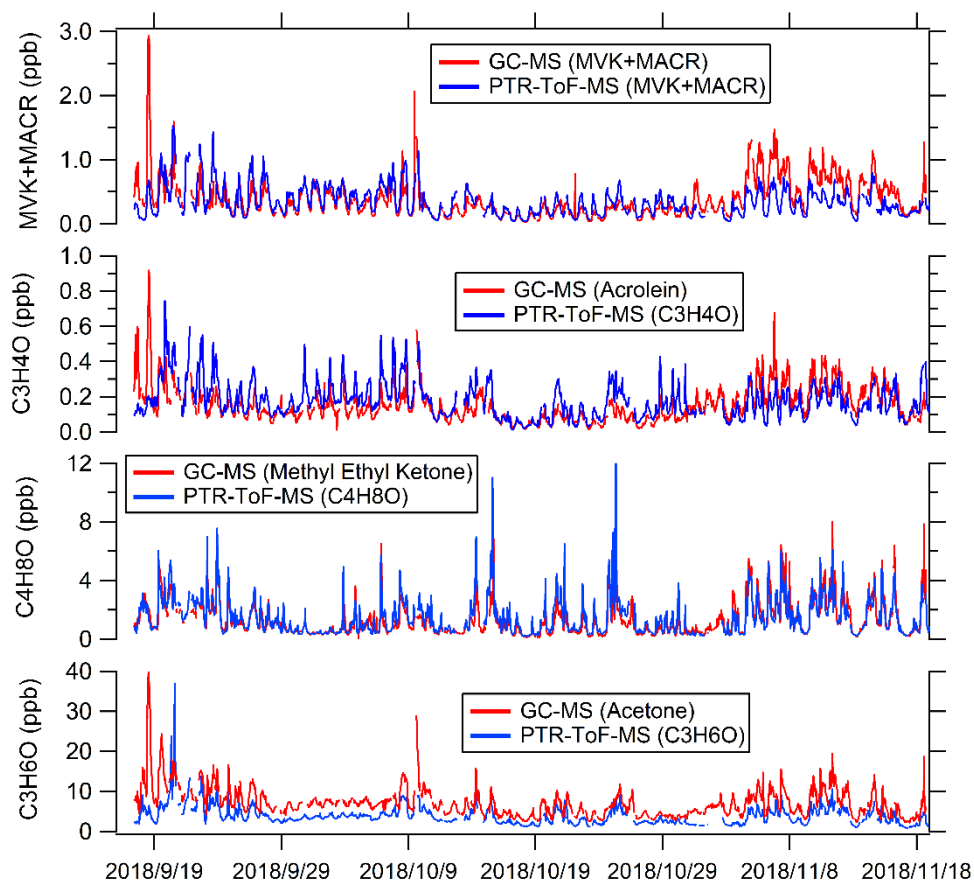

90

91 Figure S1. Comparison of typical OVOC concentrations measured by both GC-MS  
 92 and PTR-ToF-MS.

93  
94

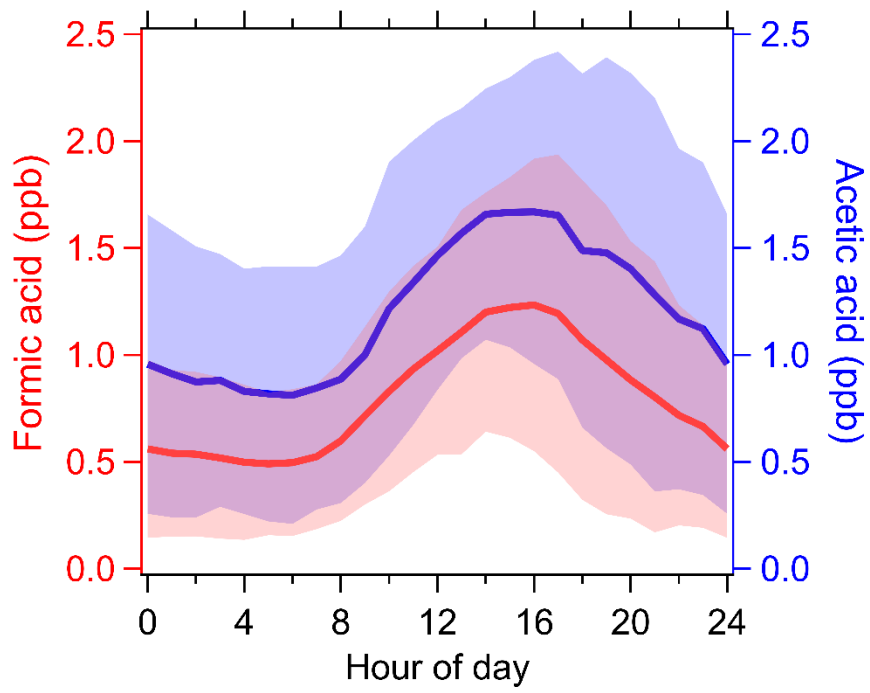

95

96 Figure S2. The average diurnal variations of concentrations of formic acid and acetic  
97 acid during the campaign.

98

99

100

101

102

103

104

105

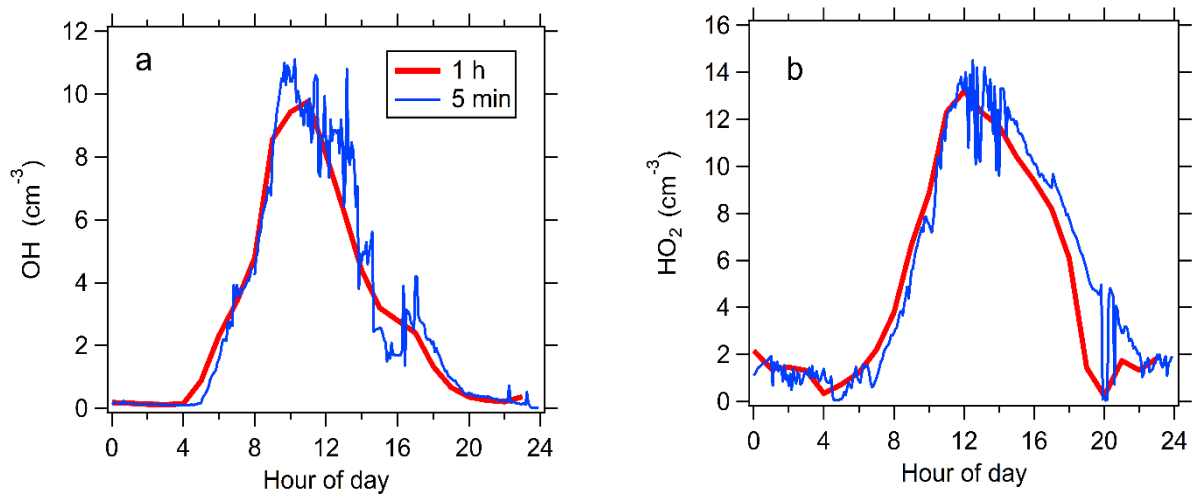

114

115 Figure S3. The simulated radical concentrations with 1-h and 5-min time resolution  
116 on October 1, 2018.

117

118

119

120

1

1

1

1

1

1

1

1

1

1

1

1

1

1

1

1

1

1

1

1

1

1

1

1

1

1

1

1

1

1

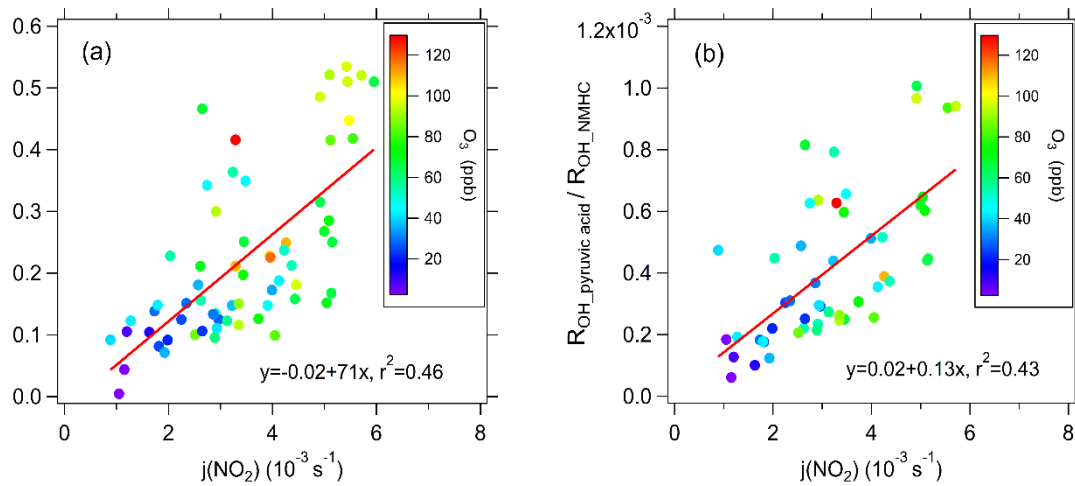

129 Figure S4. The scatter plot of daily daytime average  $\text{ROH\_HCHO}/\text{ROH\_NMHC}$  (and  
130  $\text{ROH\_pyruvic acid}/\text{ROH\_NMHC}$ ) ratios versus  $j(\text{NO}_2)$  color-coded using ozone concentrations  
131 during the campaign. Each point corresponds to a daytime average over one day of the  
132 campaign.

133  
134  
135  
136  
137  
138  
139  
140  
141  
142  
143  
144  
145  
146  
147  
148  
149  
150  
151

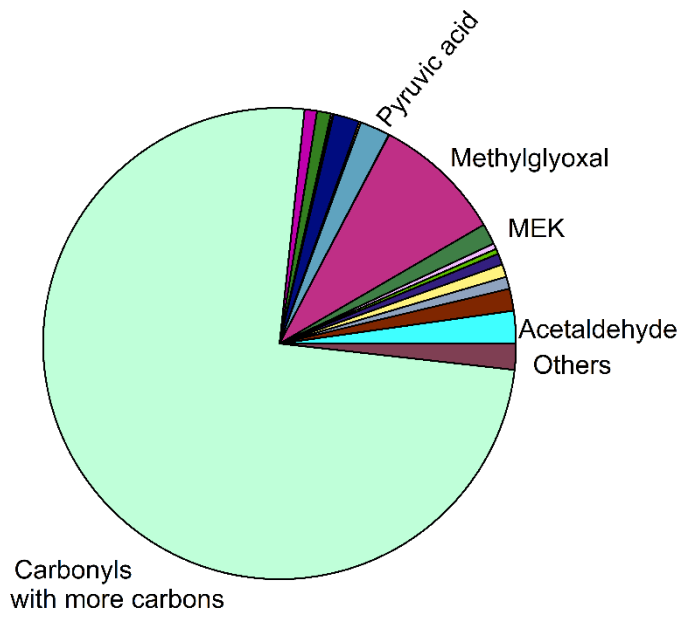

Figure S5. The relative contributions of non-HCHO OVOC species to P(RO<sub>x</sub>) for the scenarios with maximum OVOC contribution to P(RO<sub>x</sub>).



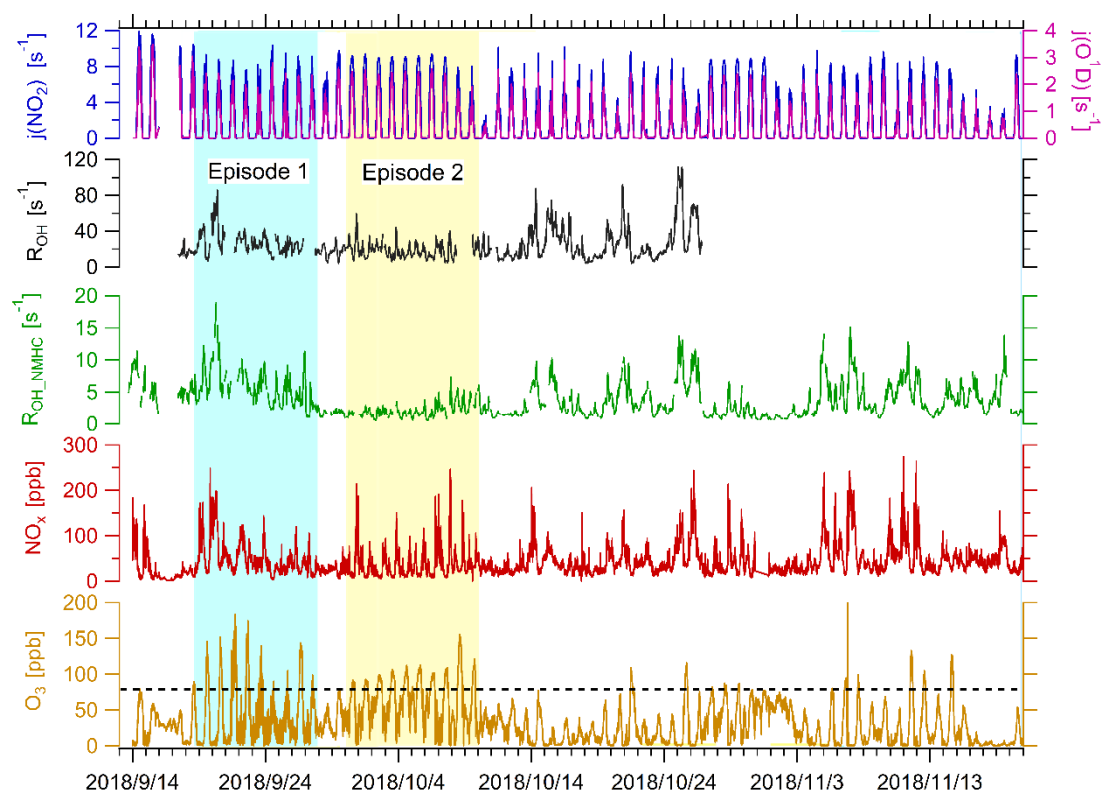

152

153 Figure S6. Time series of photolysis frequencies ( $j(\text{NO}_2)$  and  $j(\text{O}^1\text{D})$ ), total OH  
 154 reactivity ( $R_{\text{OH}}$ ), OH reactivity of NMHCs ( $R_{\text{OH\_NMHC}}$ ),  $\text{NO}_x$  concentration and  $\text{O}_3$   
 155 concentration during the campaign. The blue shade and yellow shade represent the two  
 156 ozone pollution periods which are defined as episode 1 and episode 2, respectively.

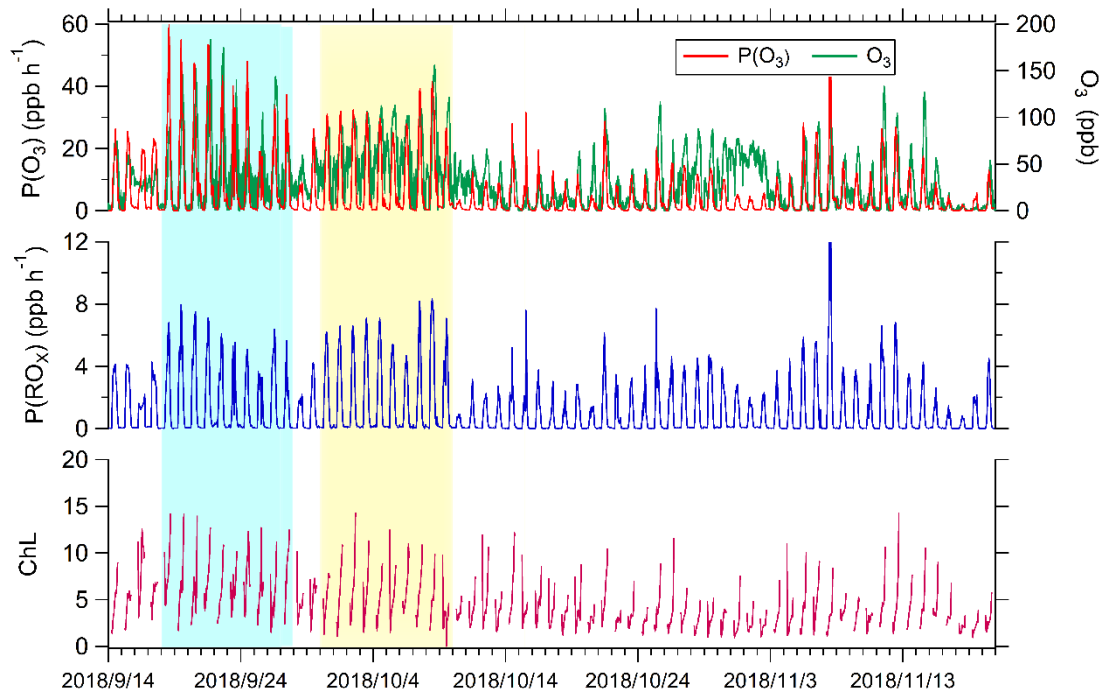

157

158 Figure S7. Time series of  $P(O_3)$ ,  $P(RO_x)$  and ChL during the campaign in Guangzhou.

159 The blue shade and yellow shade represent the two ozone pollution periods which are  
 160 defined as episode 1 and episode 2 respectively.

161

162

163

164

165

166

167

168

169

170

171

172

173

174

175

176  
177  
178  
179  
180  
181  
182  
183  
184  
185  
186  
187  
188  
189  
190  
191  
192  
193  
194

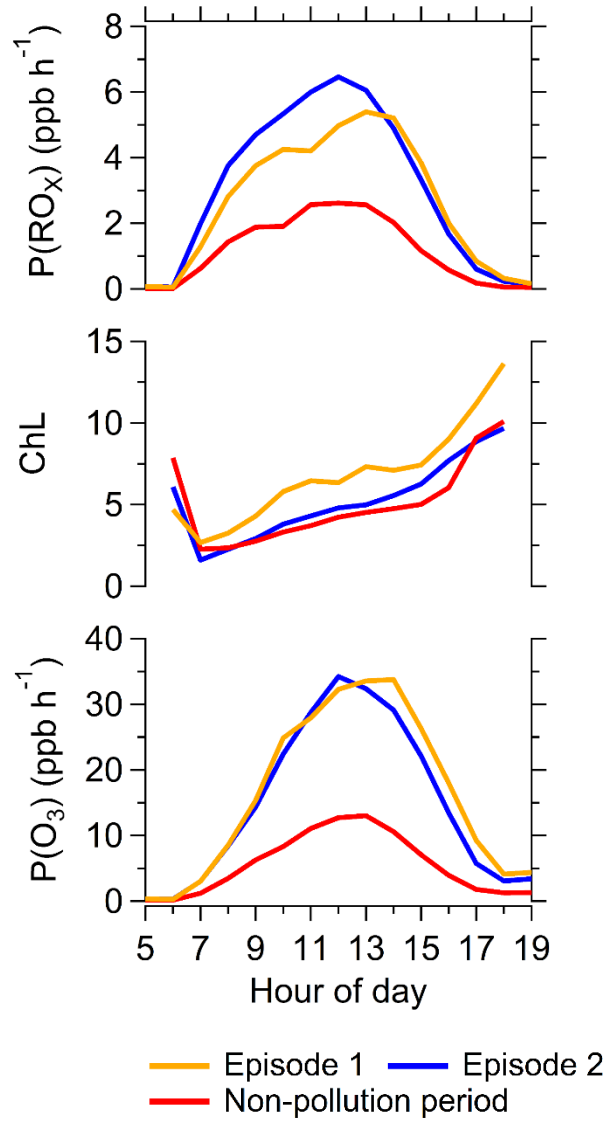

195 Figure S8. Averaged diurnal variations of  $P(\text{RO}_x)$ , ChL and  $P(\text{O}_3)$  during episode 1  
196 (yellow line), episode 2 (blue line) and non-pollution period (red line).

198 Table S1. Molecular formula, photolysis reactions, daytime average mixing ratio and  
 199 photolysis frequencies of photodegradable species during the campaign.

| Photodegradable species     | Molecular formula                                     | Measurement technology      | Mixing ratio (ppbv) | Photolysis frequency ( $s^{-1}$ )          |
|-----------------------------|-------------------------------------------------------|-----------------------------|---------------------|--------------------------------------------|
| Ozone                       | O <sub>3</sub>                                        | 49i O <sub>3</sub> analyzer | 48±17               | 7.0×10 <sup>-6</sup>                       |
| Nitrous acid                | HONO                                                  | LOPAP                       | 0.47±0.20           | 5.7×10 <sup>-4</sup>                       |
| Formaldehyde                | HCHO                                                  | Hantzsch fluorimetry        | 5.2±3.8             | 1.1×10 <sup>-5</sup>                       |
| Acetaldehyde                | CH <sub>3</sub> CHO                                   | GC-MS                       | 2.3±1.2             | 1.3×10 <sup>-6</sup>                       |
| Propanal                    | C <sub>2</sub> H <sub>5</sub> CHO                     | GC-MS                       | 0.35±0.21           | 6.1×10 <sup>-6</sup>                       |
| n-butanal                   | C <sub>3</sub> H <sub>7</sub> CHO                     | GC-MS                       | 0.20±0.14           | 6.5×10 <sup>-6</sup>                       |
| n-pentanal                  | C <sub>4</sub> H <sub>9</sub> CHO                     | GC-MS                       | 0.21±0.14           | 6.5×10 <sup>-6</sup>                       |
| n-hexanal                   | C <sub>5</sub> H <sub>11</sub> CHO                    | GC-MS                       | 0.18±0.15           | 6.7×10 <sup>-6</sup>                       |
| Methacrolein                | C <sub>4</sub> H <sub>6</sub> O                       | PTR-QiToF-MS, GC-MS         | 0.22±0.14           | 1.0×10 <sup>-6</sup>                       |
| Acetone                     | CH <sub>3</sub> COCH <sub>3</sub>                     | PTR-QiToF-MS                | 4.4±2.5             | 1.4×10 <sup>-7</sup>                       |
| Methyl Ethyl Ketone         | C <sub>4</sub> H <sub>8</sub> O                       | PTR-QiToF-MS                | 1.8±1.4             | 1.2×10 <sup>-6</sup>                       |
| Methylglyoxal               | C <sub>3</sub> H <sub>4</sub> O <sub>2</sub>          | PTR-QiToF-MS                | 0.32±0.20           | 5.5×10 <sup>-5</sup>                       |
| Methyl vinyl ketone         | C <sub>4</sub> H <sub>6</sub> O                       | PTR-QiToF-MS, GC-MS         | 0.26±0.15           | 7.2×10 <sup>-7</sup>                       |
| Methyl hydroperoxide        | CH <sub>3</sub> OOH                                   | PTR-QiToF-MS                | 0.022±0.015         | 1.8×10 <sup>-6</sup>                       |
| Pyruvic acid                | CH <sub>3</sub> COCO <sub>2</sub> H                   | PTR-QiToF-MS                | 0.05±0.04           | 6.5×10 <sup>-5</sup>                       |
| Acrolein                    | CH <sub>2</sub> =CHCHO                                | PTR-QiToF-MS                | 0.21±0.10           | 3.4×10 <sup>-7</sup>                       |
| Hydroxyacetone              | CH <sub>3</sub> C(O)CH <sub>2</sub> OH                | PTR-QiToF-MS                | 2.0±1.5             | 1.4×10 <sup>-6</sup>                       |
| Hydroxymethyl hydroperoxide | HOCH <sub>2</sub> OOH                                 | PTR-QiToF-MS                | 0.06±0.03           | 1.6×10 <sup>-6</sup>                       |
| Benzaldehyde                | C <sub>7</sub> H <sub>6</sub> O                       | PTR-QiToF-MS                | 0.15±0.11           | 1.0×10 <sup>-6</sup>                       |
| Nitrophenol                 | C <sub>6</sub> H <sub>5</sub> NO <sub>3</sub>         | PTR-QiToF-MS                | 0.026±0.018         | 5.7×10 <sup>-5</sup>                       |
| Methyl nitrophenol          | C <sub>7</sub> H <sub>7</sub> NO <sub>3</sub>         | PTR-QiToF-MS                | 0.023±0.017         | 5.7×10 <sup>-5</sup>                       |
| Carbonyls with more carbons | C <sub>n</sub> H <sub>2n</sub> O (n>5)                | PTR-QiToF-MS                | 0.31±0.24           | 1.2×10 <sup>-6</sup> ~6.5×10 <sup>-6</sup> |
|                             | C <sub>n</sub> H <sub>2n-2</sub> O (n>3)              | PTR-QiToF-MS                | 2.04±1.60           | 1.2×10 <sup>-6</sup> ~6.5×10 <sup>-6</sup> |
|                             | C <sub>n</sub> H <sub>2n-2</sub> O <sub>2</sub> (n>3) | PTR-QiToF-MS                | 0.42±0.32           | 1.2×10 <sup>-6</sup> ~1.2×10 <sup>-4</sup> |
|                             | C <sub>n</sub> H <sub>2n-4</sub> O <sub>2</sub> (n>3) | PTR-QiToF-MS                | 0.20±0.11           | 1.2×10 <sup>-6</sup> ~3.0×10 <sup>-4</sup> |
|                             | C <sub>n</sub> H <sub>2n-4</sub> O <sub>3</sub> (n>3) | PTR-QiToF-MS                | 0.13±0.07           | 1.2×10 <sup>-6</sup> ~1.8×10 <sup>-4</sup> |

|                              |                                      |              |                   |                      |
|------------------------------|--------------------------------------|--------------|-------------------|----------------------|
| Nitrophenol with more methyl | $C_{6+n}H_{5+2n}NO_3$ ( $n \geq 1$ ) | PTR-QiToF-MS | $0.021 \pm 0.014$ | $5.7 \times 10^{-5}$ |
| Benzal with more methyl      | $C_{7+n}H_{6+2n}O$ ( $n \geq 1$ )    | PTR-QiToF-MS | $0.33 \pm 0.19$   | $1.0 \times 10^{-6}$ |

---

200

201 Table S2. Observed and box-model simulated daytime average concentrations of  
 202 photodegradable OVOCs and the underestimation fraction of simulation during the  
 203 campaign.

| Photodegradable species         | Molecular formula                                        | Observed<br>Concentration<br>(ppbv) | Simulated<br>Concentration<br>(ppbv) | Underestimation<br>of simulation<br>(%) |
|---------------------------------|----------------------------------------------------------|-------------------------------------|--------------------------------------|-----------------------------------------|
| Formaldehyde                    | HCHO                                                     | 5.2±3.8                             | 4.1±3.0                              | 21                                      |
| Acetaldehyde                    | CH <sub>3</sub> CHO                                      | 2.3±1.2                             | 1.5±0.85                             | 35                                      |
| Propanal                        | C <sub>2</sub> H <sub>5</sub> CHO                        | 0.35±0.21                           | 0.25±0.16                            | 29                                      |
| n-butanal                       | C <sub>3</sub> H <sub>7</sub> CHO                        | 0.20±0.14                           | 0.048±0.035                          | 76                                      |
| n-pentanal                      | C <sub>4</sub> H <sub>9</sub> CHO                        | 0.21±0.14                           | 0.029±0.021                          | 86                                      |
| n-hexanal                       | C <sub>5</sub> H <sub>11</sub> CHO                       | 0.18±0.15                           | 0.0034±0.0030                        | 98                                      |
| Methacrolein                    | C <sub>4</sub> H <sub>6</sub> O                          | 0.22±0.14                           | 0.29±0.22                            | -32                                     |
| Acetone                         | CH <sub>3</sub> COCH <sub>3</sub>                        | 4.4±2.5                             | 1.3±1.1                              | 70                                      |
| Methyl Ethyl Ketone             | C <sub>4</sub> H <sub>8</sub> O                          | 1.8±1.4                             | 0.38±0.29                            | 79                                      |
| Methylglyoxal                   | C <sub>3</sub> H <sub>4</sub> O <sub>2</sub>             | 0.31±0.20                           | 0.20±0.16                            | 35                                      |
| Methyl vinyl ketone             | C <sub>4</sub> H <sub>6</sub> O                          | 0.26±0.15                           | 0.34±0.30                            | -31                                     |
| Methyl hydroperoxide            | CH <sub>3</sub> OOH                                      | 0.022±0.015                         | 0.016±0.013                          | 27                                      |
| Pyruvic acid                    | CH <sub>3</sub> COCO <sub>2</sub> H                      | 0.05±0.04                           | 0.026±0.022                          | 48                                      |
| Acrolein                        | CH <sub>2</sub> =CHCHO                                   | 0.21±0.10                           | 0.005±0.004                          | 97                                      |
| Hydroxyacetone                  | CH <sub>3</sub> C(O)CH <sub>2</sub> OH                   | 2.0±1.5                             | 0.66±0.54                            | 67                                      |
| Hydroxymethyl<br>Hydroperoxide  | HOCH <sub>2</sub> OOH                                    | 0.06±0.03                           | 0.02±0.01                            | 67                                      |
| Benzaldehyde                    | C <sub>7</sub> H <sub>6</sub> O                          | 0.15±0.11                           | 0.11±0.09                            | 27                                      |
| Nitrophenol                     | C <sub>6</sub> H <sub>5</sub> NO <sub>3</sub>            | 0.026±0.018                         | 0.022±0.020                          | 15                                      |
| Methyl nitrophenol              | C <sub>7</sub> H <sub>7</sub> NO <sub>3</sub>            | 0.023±0.017                         | 0.021±0.018                          | 8.7                                     |
| Carbonyls with more<br>carbons  | C <sub>n</sub> H <sub>2n</sub> O (n>5)                   | 0.31±0.24                           | 0.11±0.08                            | 65                                      |
|                                 | C <sub>n</sub> H <sub>2n-2</sub> O (n>3)                 | 2.04±1.60                           | 0.52±0.37                            | 75                                      |
|                                 | C <sub>n</sub> H <sub>2n-2</sub> O <sub>2</sub> (n>3)    | 0.42±0.32                           | 0.11±0.07                            | 74                                      |
|                                 | C <sub>n</sub> H <sub>2n-4</sub> O <sub>2</sub> (n>3)    | 0.20±0.11                           | 0.035±0.26                           | 83                                      |
|                                 | C <sub>n</sub> H <sub>2n-4</sub> O <sub>3</sub> (n>3)    | 0.13±0.07                           | 0.031±0.022                          | 74                                      |
| Nitrophenol with more<br>methyl | C <sub>6+n</sub> H <sub>5+2n</sub> NO <sub>3</sub> (n≥1) | 0.021±0.014                         | 0.011±0.009                          | 48                                      |

|                         |                                   |                 |                 |    |
|-------------------------|-----------------------------------|-----------------|-----------------|----|
| Benzal with more methyl | $C_{7+n}H_{6+2n}O$ ( $n \geq 1$ ) | $0.33 \pm 0.19$ | $0.13 \pm 0.08$ | 61 |
| 204                     |                                   |                 |                 |    |
| 205                     |                                   |                 |                 |    |
| 206                     |                                   |                 |                 |    |

207

208 Table S3. Daytime (6:00-19:00) average of O<sub>3</sub>, j(NO<sub>2</sub>), NO<sub>x</sub>, total OH reactivity (R<sub>OH</sub>),

209 OH reactivity of NMHCs (R<sub>OH\_NMHC</sub>), and R<sub>OH\_NMHC</sub>/ NO<sub>x</sub> for the two ozone episodes,

210 other periods, and the campaign average.

| Parameter                                                                      | episode 1     | episode 2     | Other periods | campaign average |
|--------------------------------------------------------------------------------|---------------|---------------|---------------|------------------|
| MDA1 O <sub>3</sub> (ppbv)                                                     | 114±35        | 106±33        | 62±22         | 75±26            |
| MDA8 O <sub>3</sub> (ppbv)                                                     | 84±27         | 96±31         | 48±17         | 60±19            |
| j(NO <sub>2</sub> ) (s <sup>-1</sup> )                                         | 0.0037±0.0028 | 0.0053±0.0041 | 0.0031±0.0025 | 0.0034±0.0026    |
| NO <sub>x</sub> (ppbv)                                                         | 41±27         | 21±14         | 37±21         | 32±17            |
| R <sub>OH_NMHC</sub> (s <sup>-1</sup> )                                        | 6.0±2.8       | 2.0±0.63      | 3.2±1.4       | 3.6±1.6          |
| R <sub>OH</sub> (s <sup>-1</sup> )                                             | 26±16         | 16±8.0        | /             | /                |
| R <sub>OH_NMHC</sub> / NO <sub>x</sub><br>(s <sup>-1</sup> ppb <sup>-1</sup> ) | 0.15±0.10     | 0.095±0.065   | 0.086±0.055   | 0.11±0.067       |

211

212

213

214

215

216

217

218

219

220

221

222

223



224

225 Reference:

226 1. Sekimoto, K.; Li, S.-M.; Yuan, B.; Koss, A.; Coggon, M.; Warneke, C.; de Gouw,  
227 J., Calculation of the sensitivity of proton-transfer-reaction mass spectrometry (PTR-  
228 MS) for organic trace gases using molecular properties. *International Journal of Mass*  
229 *Spectrometry* **2017**, *421*, 71-94.

230
